RETRACTION

# Retraction: An analysis of machine learning risk factors and risk parity portfolio optimization

The *PLOS One* Editors

The *PLOS One* Editors retract this article [1] due to concerns about potential manipulation of the publication process. In addition, the article contains multiple uses of terminology that differ from standards in the field (e.g., “head-part analysis (PCA)” instead of “principal component analysis”).

These concerns call into question the validity and provenance of the reported results. We regret that the issues were not identified prior to the article’s publication.

LW, MA, and KR did not agree with the retraction. SAQ and YAK either did not respond directly or could not be reached.

## Reference

1. Wu L, Ahmad M, Qureshi SA, Raza K, Khan YA. An analysis of machine learning risk factors and risk parity portfolio optimization. *PLoS One*. 2022;17(9):e0272521. <https://doi.org/10.1371/journal.pone.0272521> PMID: [36156075](https://pubmed.ncbi.nlm.nih.gov/36156075/)

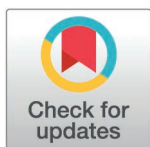

## OPEN ACCESS

**Citation:** The *PLOS One* Editors (2025) Retraction: An analysis of machine learning risk factors and risk parity portfolio optimization. *PLoS ONE* 20(5): e0323221. <https://doi.org/10.1371/journal.pone.0323221>

**Published:** May 7, 2025

**Copyright:** © 2025 The *PLOS One* Editors. This is an open access article distributed under the terms of the [Creative Commons Attribution License](https://creativecommons.org/licenses/by/4.0/), which permits unrestricted use, distribution, and reproduction in any medium, provided the original author and source are credited.
